# Supplementary material for: Meta-analysis of genome-wide association studies uncovers shared candidate genes across breeds for pig fatness trait
Source: PubMed Central journal article supplement (PMC9714057; doi:10.1186/s12864-022-09036-z), 2022-11-30

**Additional file 1: Figure S1a. PCA plot of Duroc.**

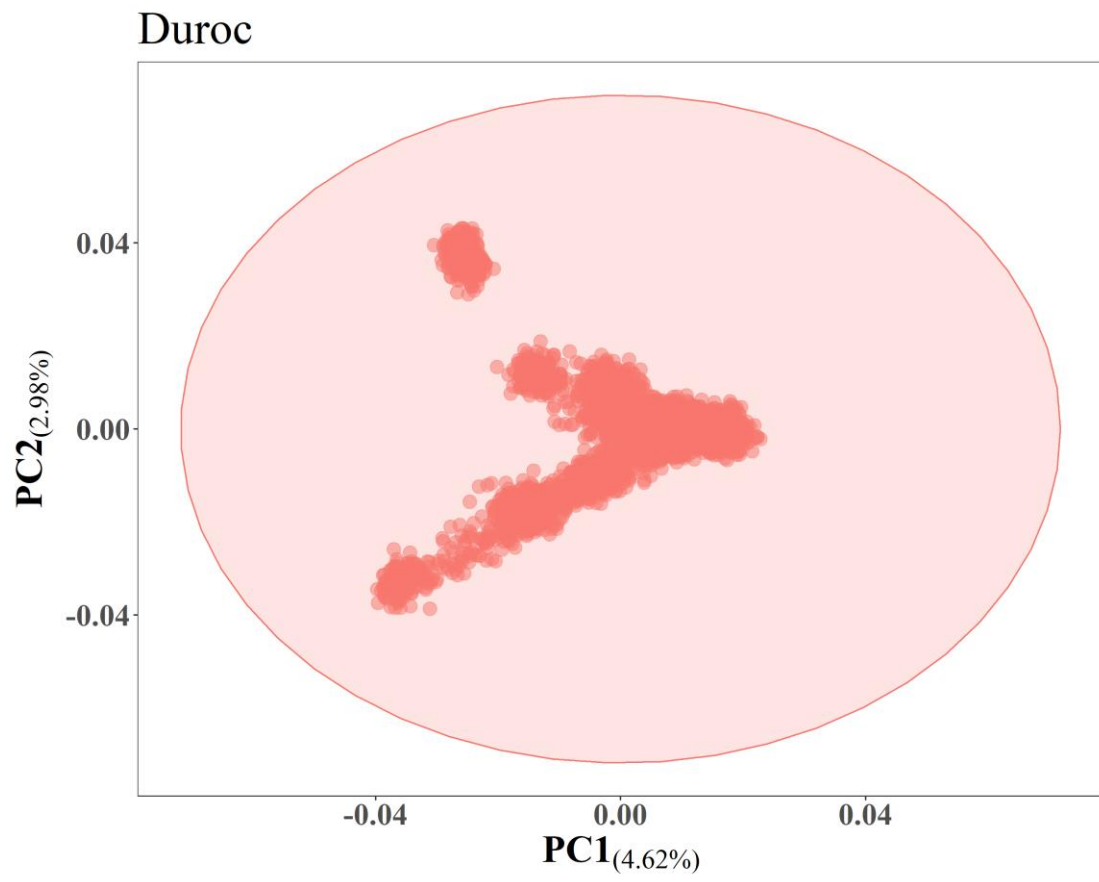

**Additional file 1: Figure S1b.** PCA plot of Yorkshire.

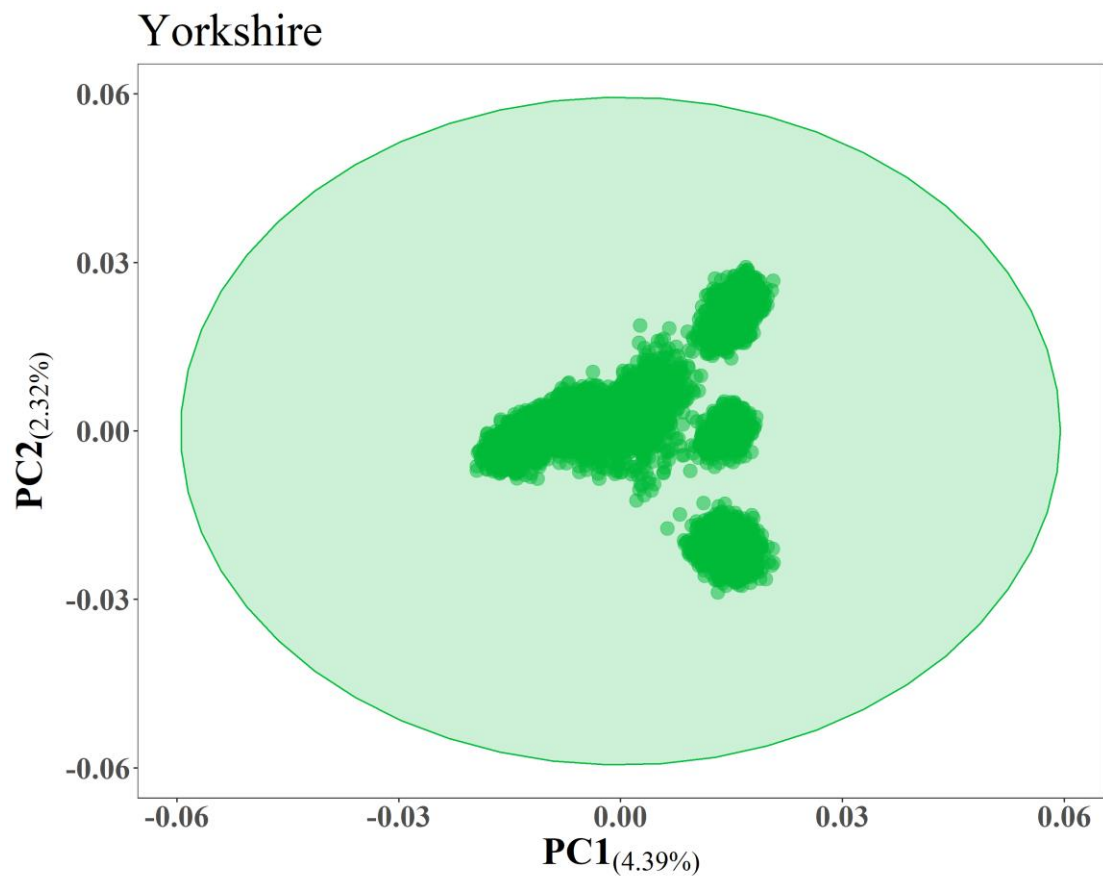

**Additional file 1: Figure S1c. PCA plot of Landrace.**

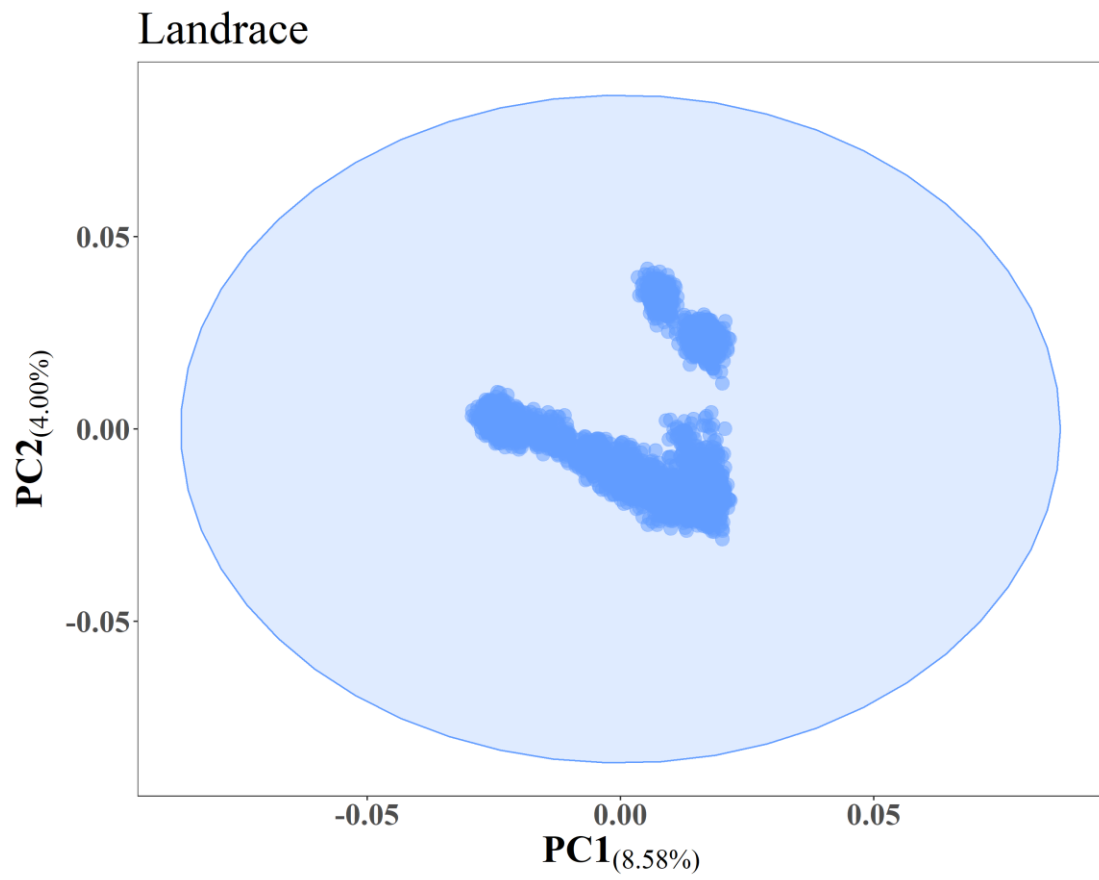

Supplement: 12864_2022_9036_MOESM1_ESM.pdf [file 12864_2022_9036_MOESM1_ESM.pdf]
