# Supplementary material for: Meta-analysis of genome-wide association studies uncovers shared candidate genes across breeds for pig fatness trait
Source: PubMed Central journal article supplement (PMC9714057; doi:10.1186/s12864-022-09036-z), 2022-11-30

**Additional file 3: Figure S2.** Venn diagram of the number of significant SNPs ( $P < 10^{-5}$ ) between 19 single population GWAS and four metaGWAS.

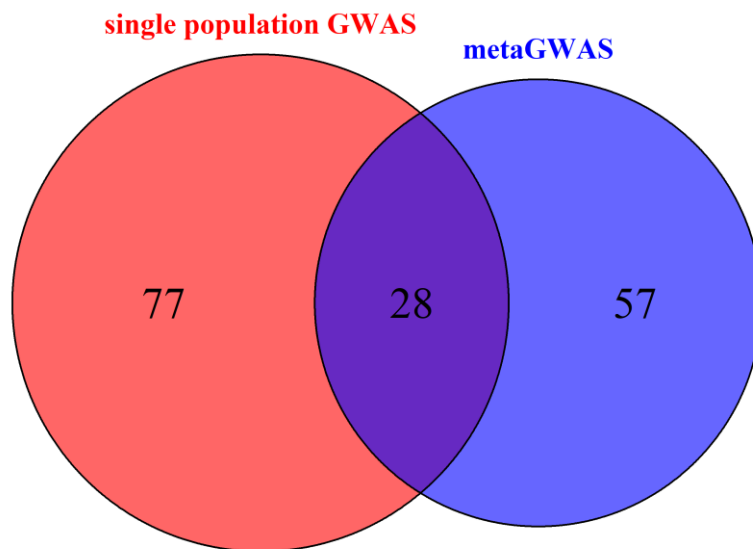

Supplement: 12864_2022_9036_MOESM3_ESM.pdf [file 12864_2022_9036_MOESM3_ESM.pdf]
