# Supplementary material for: Meta-analysis of genome-wide association studies uncovers shared candidate genes across breeds for pig fatness trait
Source: PubMed Central journal article supplement (PMC9714057; doi:10.1186/s12864-022-09036-z), 2022-11-30

**Additional file 5: Figure S3a.** Q-Q plot of metaGWAS for Duroc.

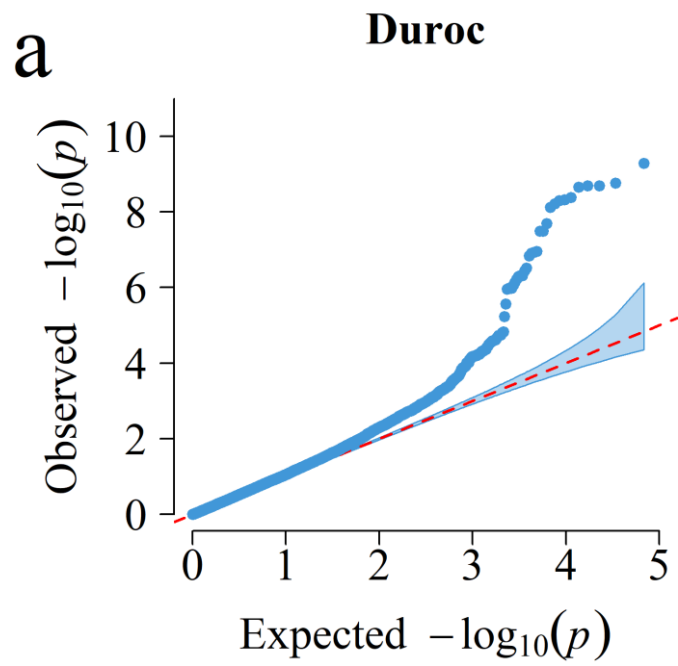

Additional file 5: Figure S3b. Q-Q plot of metaGWAS for Yorkshire.

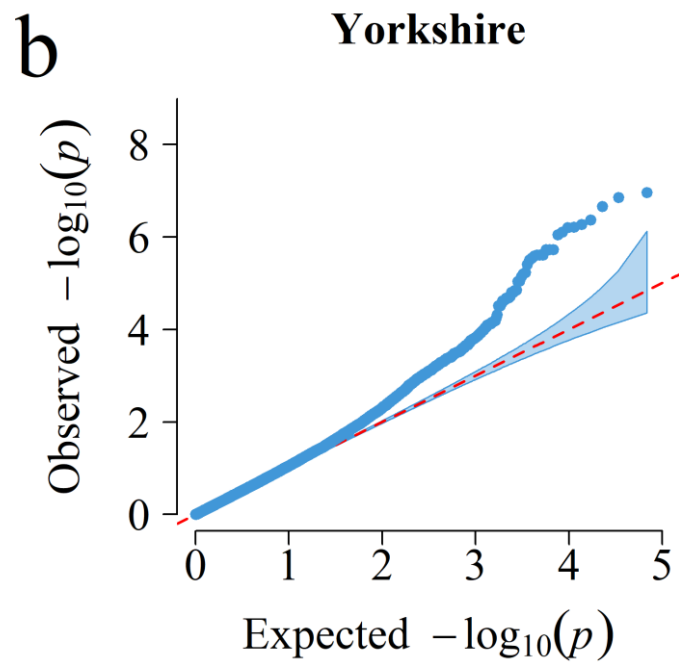

**Additional file 5: Figure S3c.** Q-Q plot of metaGWAS for Landrace.

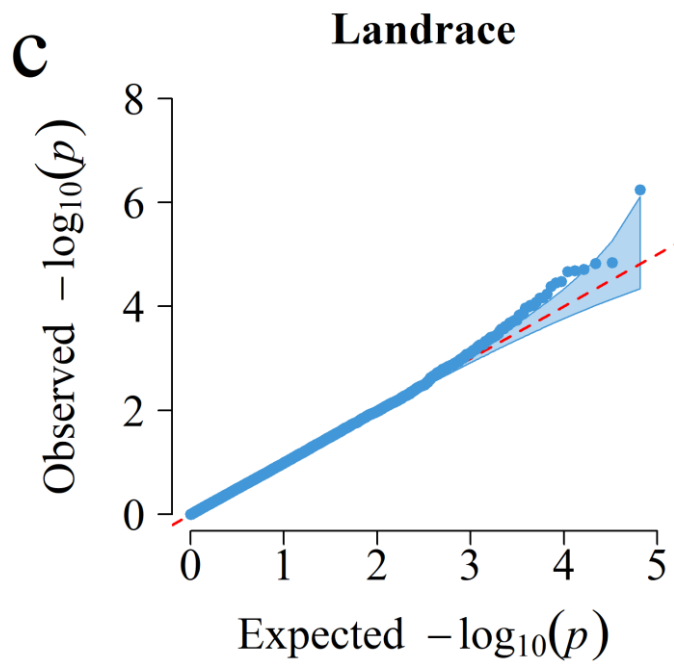

**Additional file 5: Figure S3d.** Q-Q plot of metaGWAS for across-breed strategy.

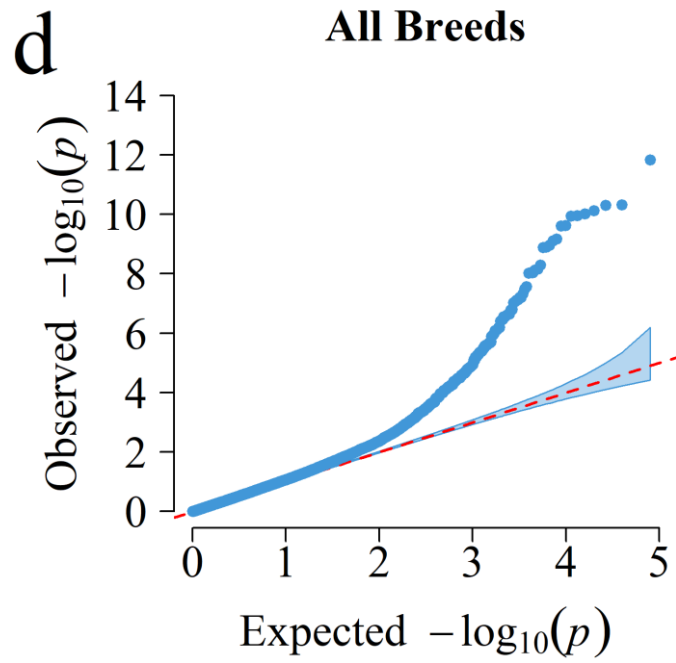

Supplement: 12864_2022_9036_MOESM5_ESM.pdf [file 12864_2022_9036_MOESM5_ESM.pdf]
